# Supplementary material for: Self‐Assembled Supramolecular Hybrid Hydrogel Beads Loaded with Silver Nanoparticles for Antimicrobial Applications
Source: PubMed Central journal article supplement (PMC7384024; doi:10.1002/chem.202001349), 2020-06-11
Supplement: CHEM-26-8452-s001.pdf [file CHEM-26-8452-s001.pdf]

# Chemistry–A European Journal

Supporting Information

## **Self-Assembled Supramolecular Hybrid Hydrogel Beads Loaded with Silver Nanoparticles for Antimicrobial Applications**

Carmen C. Piras, Clare S. Mahon, and David K. Smith<sup>\*[a]</sup>

# Self-Assembled Supramolecular Gel Beads Loaded with Silver Nanoparticles for Antimicrobial Applications

Carmen C. Piras,<sup>a</sup> Clare S. Mahon<sup>a</sup> and David K. Smith<sup>\*a</sup>

a: Department of Chemistry, University of York, Heslington, York, YO10 5DD, UK

Email: david.smith@york.ac.uk

## SUPPORTING INFORMATION

- S1 General experimental methods
- S2 Gel preparation
- S3 NMR study
- S4 Uptake of Ag(I)
- S5 Transmission and Scanning Electron Microscopy (TEM and SEM)
- S6 Thermal stability studies
- S7 Rheology
- S8 Disc diffusion assays
- S9 Release of Ag(I) from DBS-CONHNH<sub>2</sub>/alginate gel beads loaded with Ag NPs
- S10 References

## S1 General Experimental Methods

All compounds used in synthesis and analysis were purchased from standard commercial suppliers and used as received. The alginate employed in all the experiments was bought from Sigma Aldrich as sodium salt (2% viscosity). The synthesis of DBS-CONH<sub>2</sub> was performed in good yields applying previously reported methods.<sup>1,2</sup> TEM images were obtained on a FEI Tecnai 12 G<sup>2</sup> fitted with a CCD camera. Ag NPs diameters were measured using the *ImageJ* software. SEM images were taken using a JEOL JSM-7600F field emission SEM.  $T_{gel}$  values were obtained using a high precision thermoregulated oil bath using the tube inversion method and were recorded in triplicate. Rheology was measured on a Malvern Instruments Kinexus Pro+ Rheometer fitted with a 20 mm parallel plate geometry.

## S2 Gel Preparation

*S2.1 DBS-CONH<sub>2</sub> gels.* DBS-CONH<sub>2</sub> (0.3% or 0.4% wt/vol) was suspended in water (1 mL). The suspension was sonicated to help the dispersion of the solid particles and then heated until complete dissolution of the compound. The sample was left undisturbed to cool, allowing gel formation in a few minutes.

*S2.2 Alginate gels.* Alginate gels were prepared by adding a CaCl<sub>2</sub> solution (5.0% wt/vol – 1 mL) to an aqueous alginate solution (0.8% wt/vol – 1 mL). Gelation occurred immediately. The excess of CaCl<sub>2</sub> solution was then removed and the gels were washed with water multiple times.

*S2.3 DBS-CONH<sub>2</sub>/alginate two-component gels (extended interpenetrating networks).* DBS-CONH<sub>2</sub> (0.3% wt/vol in 1 mL final total volume) was suspended in water (0.5 mL) and sonicated to help the dispersion of the solid particles. An aqueous alginate solution (1.0% wt/vol - 0.5 mL) was then added. The resulting suspension was heated until complete dissolution of the DBS-CONH<sub>2</sub>. The sample was left undisturbed for few hours to allow the formation of the DBS-CONH<sub>2</sub> network. A solution of CaCl<sub>2</sub> (5.0% wt/vol – 1 mL) was then added on top of each gel to crosslink the alginate chains for 30 min. The excess of CaCl<sub>2</sub> solution was then removed and the gels were washed with water multiple times.

*S2.4 Alginate gel beads.* Alginate gel beads were prepared by dropwise addition (20  $\mu\text{L}/\text{drop}$ ) of an aqueous alginate solution (0.8% wt/vol – 1 mL) to a  $\text{CaCl}_2$  solution (5.0% wt/vol). The obtained beads were collected by filtration and washed with water multiple times.

*S2.5 DBS-CONHNH<sub>2</sub>/alginate two-component gel beads.* DBS-CONHNH<sub>2</sub> (0.3% wt/vol in 1 mL final total volume) was suspended in water (0.5 mL) and sonicated to help the dispersion of the solid particles. An aqueous alginate solution (1.0% wt/vol - 0.5 mL) was subsequently added. The resulting suspension was heated until complete dissolution of the DBS-CONHNH<sub>2</sub>. The hot solution was then added dropwise (20  $\mu\text{L}/\text{drop}$ ) to a  $\text{CaCl}_2$  solution (5.0% wt/vol). The obtained beads were collected by filtration and washed with water multiple times.

*S2.6 In situ formation of Ag nanoparticles into gels.* Each of these gels was thoroughly washed with water multiple times and immersed in 1 or 3 mL of  $\text{AgNO}_3$  solution (10 mM) for 3 days. After 3 days, the supernatant was gently removed with a pipette and the gels were washed with water multiple times. A colour change was observed in the samples in which the Ag was reduced from  $\text{Ag(I)}$  to  $\text{Ag(0)}$ .

### **S3. NMR study**

The DBS-CONHNH<sub>2</sub>/alginate gel beads used for this study were prepared as described in Section S2.5 using a 0.3% wt/vol concentration of DBS-CONHNH<sub>2</sub>, a 0.5% wt/vol concentration of alginate and replacing water with  $\text{D}_2\text{O}$ . Ten gel beads were isolated and transferred into a NMR tube.  $\text{D}_2\text{O}$  (0.5 mL) was then added together with DMSO (2  $\mu\text{L}/\text{mL}$ ), which was used as an internal standard. The sample was then placed in the spectrometer. A  $^1\text{H}$  NMR was immediately recorded to confirm that the DBS-CONHNH<sub>2</sub> incorporated into the gel beads was in its self-assembled state. The sample was then heated to 90°C. Spectra were recorded every 10 minutes for 60 minutes and then every 30 minutes for 12.5 hours. The concentration of the mobile components was calculated by comparison of the integrals of relevant peaks (DBS-CONHNH<sub>2</sub> aromatic peaks  $\delta = 7.55$  and 7.62) to that of DMSO ( $\delta = 2.50$  ppm). The obtained data are reported in Table S1.

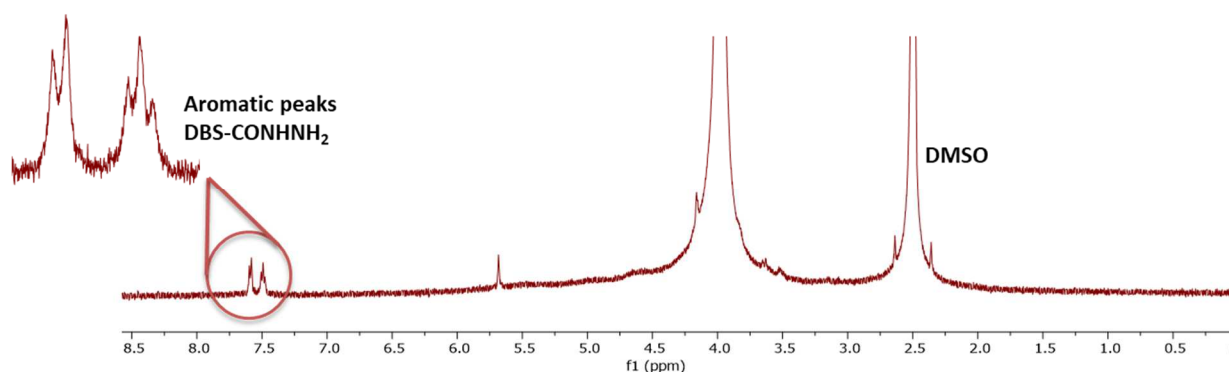

Figure S1.  $^1\text{H}$  NMR of ten DBS-CONH $_2$ /alginate gel beads after 1 hour at 90°C.

Table S1. Percentage of free DBS-CONH $_2$  into ten DBS-CONH $_2$ /alginate gel beads over time at a constant temperature of 90°C.

| Time (mins) | % of unmobilised DBS-CONH $_2$ into gel beads | Time (mins) | % of unmobilised DBS-CONH $_2$ into gel beads |
|-------------|-----------------------------------------------|-------------|-----------------------------------------------|
| 0           | 0                                             | 360         | 67.70                                         |
| 10          | 41.71                                         | 390         | 68.66                                         |
| 20          | 46.52                                         | 420         | 68.34                                         |
| 30          | 48.45                                         | 450         | 69.62                                         |
| 40          | 55.83                                         | 480         | 67.38                                         |
| 50          | 56.47                                         | 510         | 70.26                                         |
| 60          | 57.75                                         | 540         | 71.23                                         |
| 90          | 58.71                                         | 570         | 72.19                                         |
| 120         | 59.35                                         | 600         | 72.83                                         |
| 150         | 58.39                                         | 630         | 69.30                                         |
| 180         | 59.68                                         | 660         | 72.51                                         |
| 210         | 59.35                                         | 690         | 72.19                                         |
| 240         | 58.07                                         | 720         | 73.79                                         |
| 270         | 60.00                                         | 750         | 75.72                                         |
| 300         | 65.45                                         | 780         | 75.72                                         |
| 330         | 69.30                                         | 810         | 74.44                                         |

#### S4 Uptake of Ag (I)

S4.1 Uptake of Ag (I) into DBS-CONH $_2$ , alginate and DBS-CONH $_2$ /alginate gels (extended interpenetrating networks). The gels used to estimate the uptake of Ag (I) were prepared in water

(1 mL) as described in section S2. Each of these gels was thoroughly washed with water multiple times and immersed in 1 or 3 mL of a 10 mM  $\text{AgNO}_3$  solution (containing respectively 0.01 or 0.03 mmoles of  $\text{Ag(I)}$ ) for 3 days (Figure S2). After 3 days, the supernatant was transferred into a vial and used to titrate a 0.05 mM solution of  $\text{NaCl}$  (2 mL) in the presence of  $\text{K}_2\text{CrO}_4$  (5%) as an indicator. To evaluate precisely the volume of titrant used, the titration was performed by slowly adding the titrant to the  $\text{NaCl}$  solution in 10  $\mu\text{L}$  drops under stirring. The volume of supernatant added as a titrant, was used to calculate the mmoles of residual  $\text{Ag(I)}$  in the supernatant (*i.e.* the  $\text{Ag(I)}$  that was not incorporated into the gel). This was subtracted from the initial mmoles of  $\text{Ag(I)}$  added, to give the mmoles of  $\text{Ag(I)}$  incorporated into the gel. To ensure data reproducibility, this experiment was performed in triplicate for each gel and average values are reported.

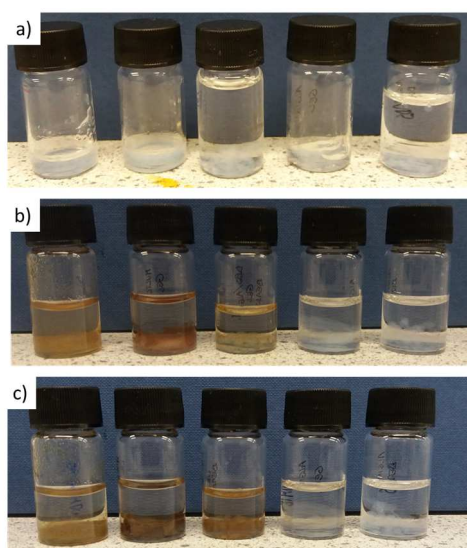

Figure S2. Comparison of colour change during  $\text{Ag}$  uptake. Gels (from left to right):  $\text{DBS-CONHNH}_2$  gel, multicomponent gel extended interpenetrating networks, multicomponent gel beads, alginate gel and alginate gel beads – (a) before  $\text{AgNO}_3$  addition, (b) after 24 hours, and (c) after 72 hours.

**S4.2 Uptake of  $\text{Ag(I)}$   $\text{DBS-CONHNH}_2$ /alginate and alginate gel beads.** The gel beads used to estimate the uptake of  $\text{Ag(I)}$  were prepared as described in section S2. Each gel bead was prepared in a 20  $\mu\text{L}$  volume. Since ten gel beads per type of gel were prepared, a 200  $\mu\text{L}$  total volume of gel (*i.e.* 1/5 of the volume used for the gels described in Section S4.1) was considered for the subsequent addition of  $\text{AgNO}_3$  in the same proportion used for the other gels. Once ready, the gel beads were thoroughly washed with water multiple times and immersed in 0.2 or 0.6 mL of a 10 mM  $\text{AgNO}_3$  solution (containing respectively 0.002 or 0.006 mmoles of  $\text{Ag(I)}$ ) for 3 days (Figure S3). After 3 days,

the supernatant was transferred into a vial and used to titrate a 0.05 mM solution of NaCl (2 mL) in the presence of  $K_2CrO_4$  (5%) as an indicator. To evaluate precisely the volume of titrant used, the titration was performed by slowly adding the titrant to the NaCl solution in 10  $\mu$ L drops under stirring. The volume of supernatant added as a titrant, was used to calculate the mmoles of residual Ag (I) in the supernatant (*i.e.* the Ag (I) that was not incorporated into the gel). This was subtracted to the initial mmoles of Ag (I) added, to give the mmoles of Ag (I) incorporated into the gel. To ensure data reproducibility, this experiment was performed in triplicate for each gel and average values are reported.

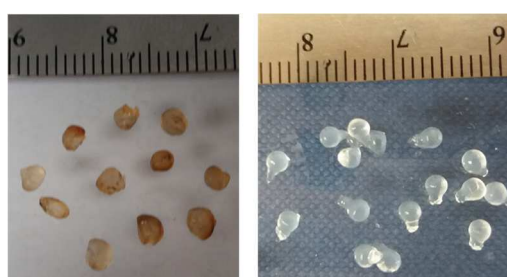

Figure S3. Comparison of colour change between (from left to right) DBS-CONH $NH_2$ /alginate multicomponent gel beads and alginate gel beads after AgNO $_3$  addition (72 hours).

Table S2. Evaluation of Ag (I) uptake into DBS-CONH $NH_2$ , alginate and DBS-CONH $NH_2$ /alginate multicomponent gels by precipitation titration.

| Gel                      | Loading of DBS-CONH $NH_2$ (wt/vol) | Loading of Alginate (wt/vol) | mmoles of AgNO $_3$ loaded onto gel | mmoles of Ag (I) incorporated into gel | mmoles of Ag (I) incorporated / mL of gel | % of Ag (I) incorporated |
|--------------------------|-------------------------------------|------------------------------|-------------------------------------|----------------------------------------|-------------------------------------------|--------------------------|
| DBS-CONH $NH_2$          | 0.3 %                               | -                            | 0.03                                | 0.015                                  | 0.015                                     | 50 %                     |
| DBS-CONH $NH_2$          | 0.3 %                               | -                            | 0.01                                | > 0.009                                | > 0.009                                   | > 90 %                   |
| Alginate (EIPN)          | -                                   | 0.8 %                        | 0.03                                | 0.015                                  | 0.015                                     | 50 %                     |
| Alginate (EIPN)          | -                                   | 0.8 %                        | 0.01                                | 0.0057                                 | 0.0057                                    | 57 %                     |
| Alginate (10B)           | -                                   | 0.8 %                        | 0.006                               | 0.0029                                 | 0.0145                                    | 49 %                     |
| Alginate (10B)           | -                                   | 0.8 %                        | 0.002                               | 0.0013                                 | 0.0065                                    | 65 %                     |
| Two-component gel (EIPN) | 0.3 %                               | 0.5 %                        | 0.03                                | 0.014                                  | 0.014                                     | 47 %                     |
| Two-component gel (EIPN) | 0.3 %                               | 0.5 %                        | 0.01                                | 0.007                                  | 0.007                                     | 76 %                     |
| Two-component gel (10B)  | 0.3 %                               | 0.5 %                        | 0.006                               | 0.0036                                 | 0.018                                     | 60 %                     |
| Two-component gel (10B)  | 0.3 %                               | 0.5 %                        | 0.002                               | 0.0013                                 | 0.0065                                    | 65 %                     |

\*EIPN = Extended interpenetrating networks (1 mL volume/gel); 10B = 10 gel beads (20  $\mu$ L volume/gel bead).

## S5 Transmission and Scanning Electron Microscopy (TEM and SEM)

*S5.1 Preparation of samples for TEM.* Samples for TEM were obtained by placing a small amount of each sample on a copper grid. The excess sample was removed with filter paper and allowed to set for 5 min. The samples were left to rest for 30 min before taking the images. The diameter of the Ag NPs was measured on the TEM images with the *ImageJ* software on an average of 100 NPs per gel.

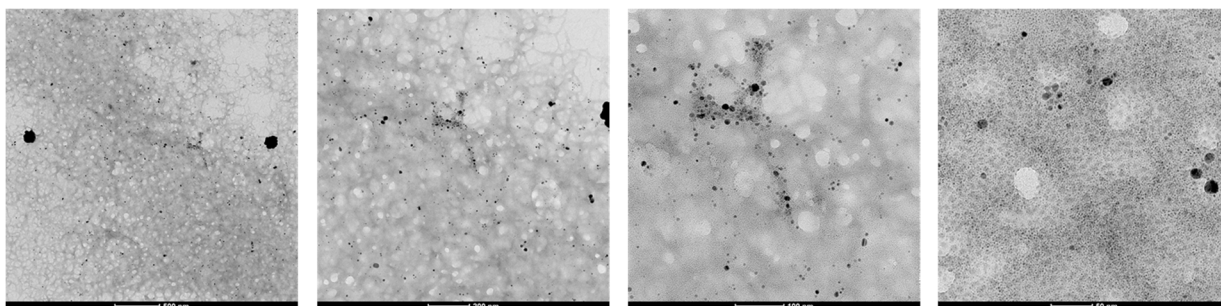

Figure S4. TEM images of DBS-CONH<sub>2</sub>H<sub>2</sub>/alginate two-component gel incorporating Ag NPs (scale bars from left to right: 500, 200 100 and 50 nm).

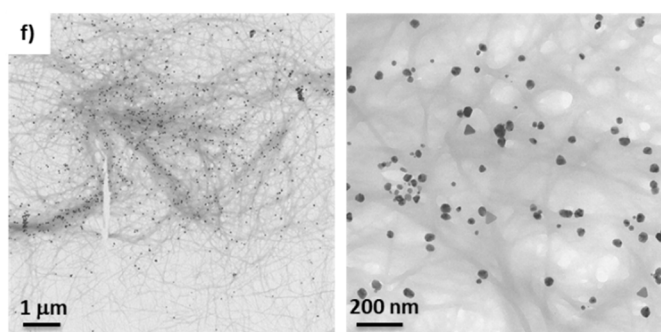

Figure S5. TEM images of DBS-CONH<sub>2</sub>H<sub>2</sub> gel incorporating Ag NPs (scale bars from left to right: 1 μm and 200 nm).

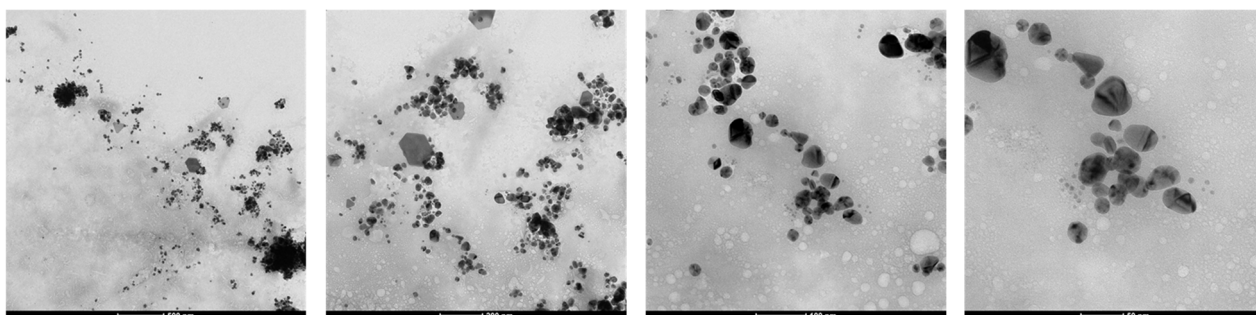

Figure S6. TEM images of alginate gel incorporating Ag NPs (scale bars from left to right: 500, 200 100 and 50 nm).



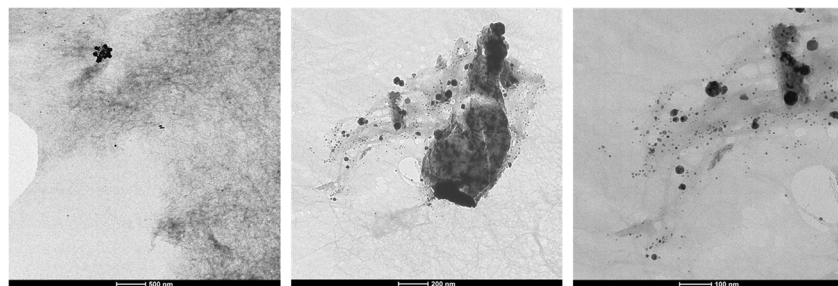

Figure S7. TEM images of alginate beads incorporating Ag NPs (scale bars from left to right: 500, 200 and 100 nm).

**S5.2 Preparation of samples for SEM.** Samples for SEM were obtained by freeze drying the gels on copper shim pieces. The freeze-dried samples were then mounted on stubs and the images recorded.

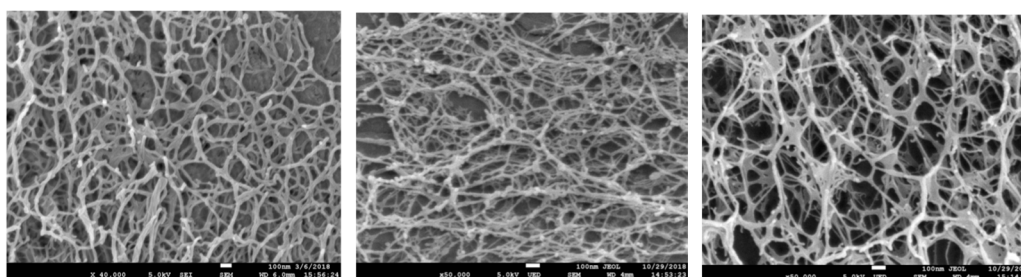

Figure S8. SEM images of (from left to right) DBS-CONHNH<sub>2</sub> gel), DBS-CONHNH<sub>2</sub>/alginate two-component gel interpenetrating networks and alginate gel (scale bars: 100 nm).

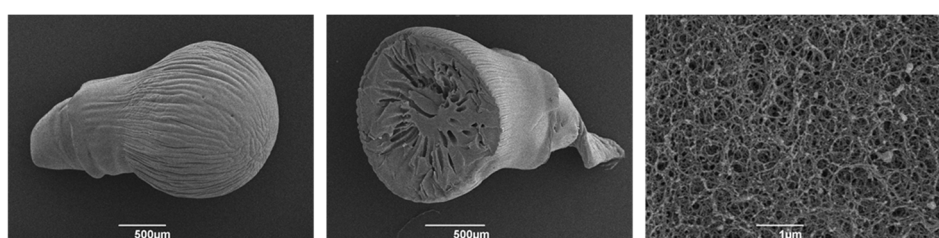

Figure S9. SEM images of an alginate gel bead (left) and its cross-section (middle and right) incorporating Ag NPs (scale bars from left to right: 500, 500 and 1 μm).

## S6 Thermal stability studies

**S6.1  $T_{gel}$  Values.** All the gels for  $T_{gel}$  determination were prepared as described in Section S2 and S3 in 7 mL vials (diameter: 2 cm, height: 5 cm). The gels were placed in a high precision thermo-

regulated oil bath with an initial temperature of 25°C. The temperature was increased by 1°C/min until 100°C. Every minute the gels were checked by tube inversion method and  $T_{\text{gel}}$  was considered as the temperature at which the gel began to run down the sides of the vial. These experiments were performed in triplicate to ensure reproducibility and the average is reported. Errors are estimated at  $\pm 2^\circ\text{C}$ .

Table S3.  $T_{\text{gel}}$  values of gels formed by individual gelators and the DBS-CONH<sub>2</sub>/alginate two-component gel (interpenetrating networks) with and without Ag NPs.

| Gel (1 mL total volume)                           | Loading of DBS-CONH <sub>2</sub> (wt/vol) | Loading of Alginate (wt/vol) | mmoles of AgNO <sub>3</sub> loaded onto gel | $T_{\text{gel}}$ |
|---------------------------------------------------|-------------------------------------------|------------------------------|---------------------------------------------|------------------|
| DBS-CONH <sub>2</sub>                             | 0.3%                                      | -                            | -                                           | 86 °C            |
| DBS-CONH <sub>2</sub>                             | 0.3%                                      | -                            | 0.01                                        | 37 °C            |
| DBS-CONH <sub>2</sub>                             | 0.3%                                      | -                            | 0.03                                        | 30 °C            |
| Alginate                                          | -                                         | 0.8%                         | -                                           | >100 °C          |
| Alginate                                          | -                                         | 0.8%                         | 0.01                                        | >100 °C          |
| Alginate                                          | -                                         | 0.8%                         | 0.03                                        | >100 °C          |
| DBS-CONH <sub>2</sub> /alginate two-component gel | 0.3%                                      | 0.5%                         | -                                           | >100 °C          |
| DBS-CONH <sub>2</sub> /alginate two-component gel | 0.3%                                      | 0.5%                         | 0.01                                        | >100 °C          |
| DBS-CONH <sub>2</sub> /alginate two-component gel | 0.3%                                      | 0.5%                         | 0.03                                        | >100 °C          |

## S7 Rheology

*S7.1 Sample preparation.* Gel samples for rheology were prepared as described in Section S2 using bottomless vials as templates to obtain the intended gel dimensions. The measurements were carried out at 25°C using a 20 mm parallel plate and a gap of 2 mm. To avoid solvent evaporation and keep the sample hydrated, a solvent trap was used, and the internal atmosphere was kept saturated. Amplitude sweep experiments were performed in the range of 0.05-100% strain at a 1 Hz frequency to identify the linear viscoelastic region. Frequency sweep experiments were performed between 0.1 and 100 Hz using a shear strain of 0.25%. The measurements were repeated three times to ensure reproducibility and the average data are shown.

## S7.2 Rheological data collected

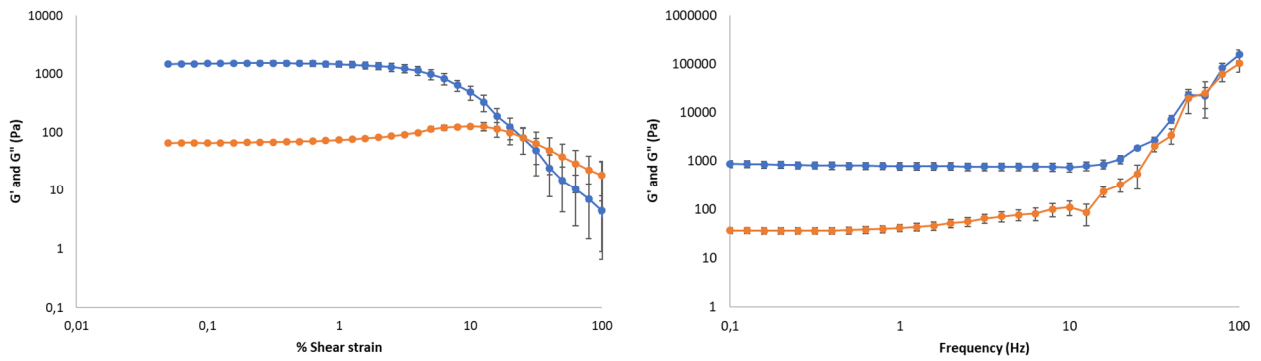

Figure S10. Elastic ( $G'$ , blue circles) and viscous ( $G''$ , orange circles) moduli of DBS-CONH<sub>2</sub> hydrogel (0.4% wt/vol) with increasing shear strain (left) and frequency (right).

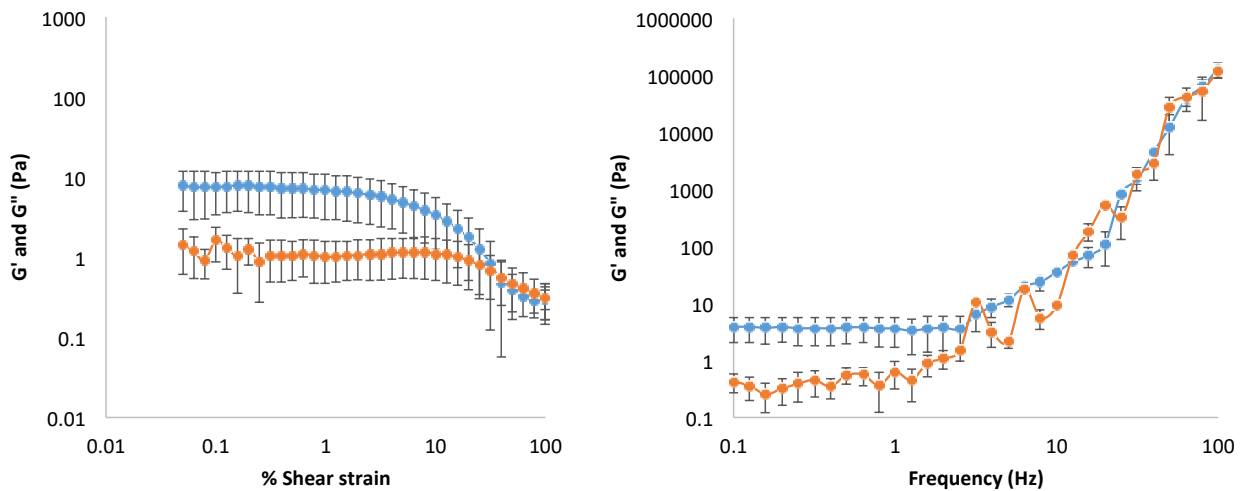

Figure S11. Elastic ( $G'$ , blue circles) and viscous ( $G''$ , orange circles) moduli of DBS-CONH<sub>2</sub> hydrogel (0.4% wt/vol - loaded with 1 mL AgNO<sub>3</sub> 10 mM) with increasing shear strain (left) and frequency (right).

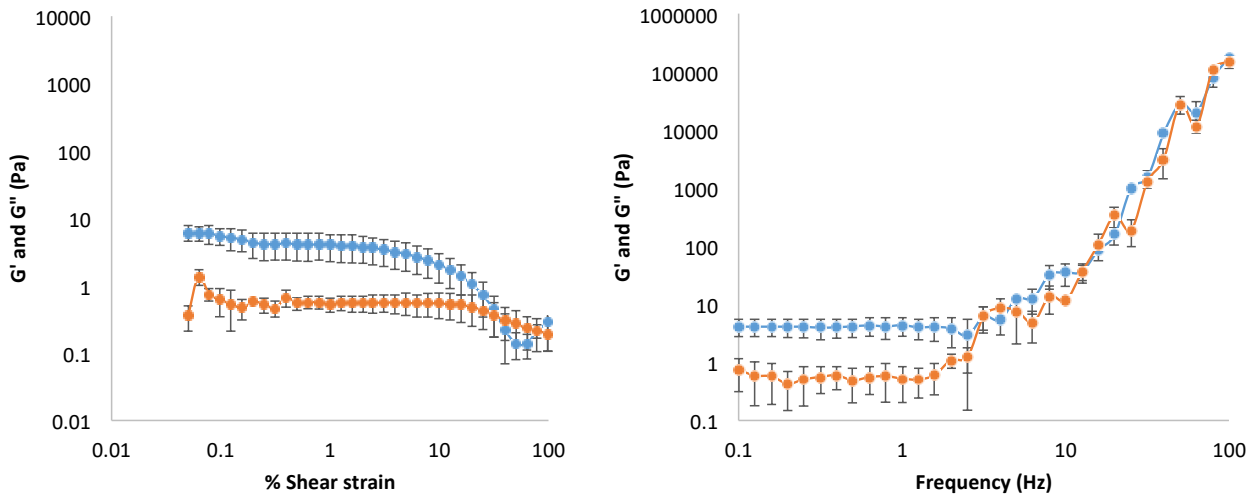

Figure S12. Elastic ( $G'$ , blue circles) and viscous ( $G''$ , orange circles) moduli of DBS-CONH<sub>2</sub> hydrogel (0.4% wt/vol - loaded with 3 mL AgNO<sub>3</sub>, 10 mM) with increasing shear strain (left) and frequency (right).

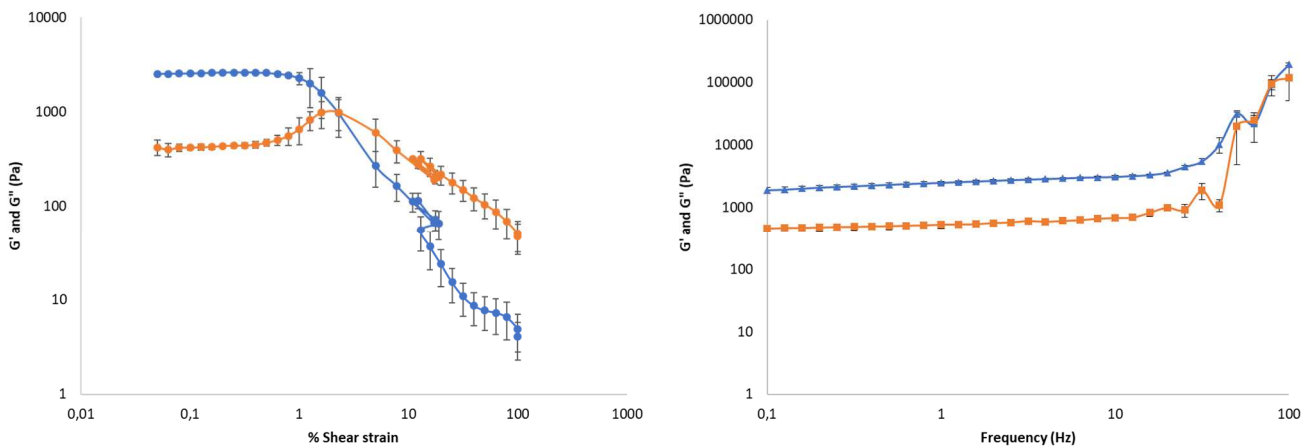

Figure S13. Elastic ( $G'$ , blue circles) and viscous ( $G''$ , orange circles) moduli of alginate hydrogel (0.8% wt/vol) with increasing shear strain (left) and frequency (right).

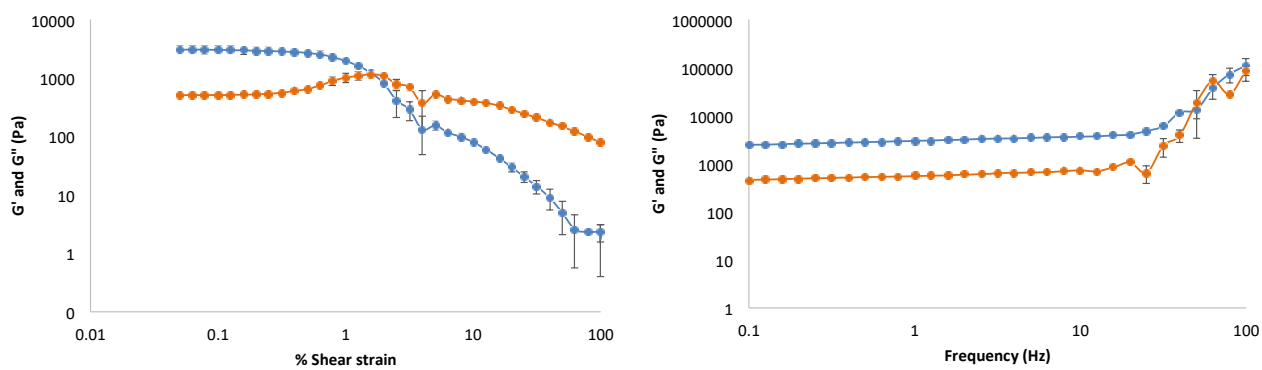

Figure S14. Elastic ( $G'$ , blue circles) and viscous ( $G''$ , orange circles) moduli of alginate hydrogel (0.8% wt/vol- loaded with 1 mL  $\text{AgNO}_3$ , 10 mM) with increasing shear strain (left) and frequency (right).

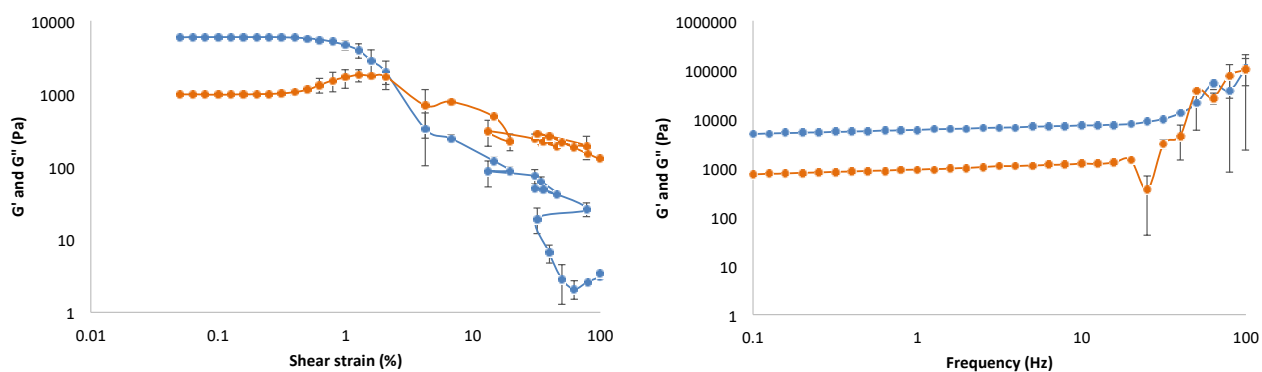

Figure S15. Elastic ( $G'$ , blue circles) and viscous ( $G''$ , orange circles) moduli of alginate hydrogel (0.8% wt/vol- loaded with 3 mL  $\text{AgNO}_3$  10 mM) with increasing shear strain (left) and frequency (right).

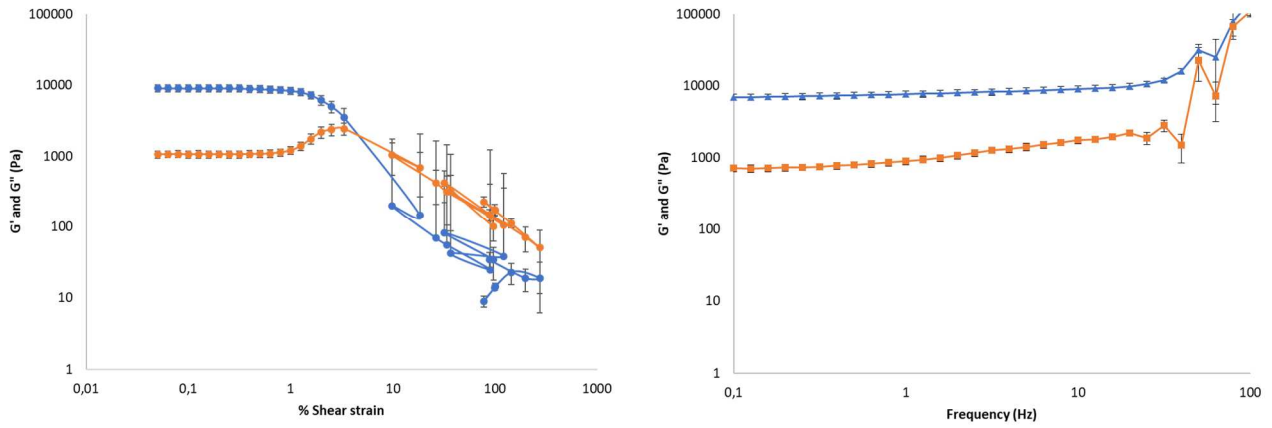

Figure S16. Elastic ( $G'$ , blue circles) and viscous ( $G''$ , orange circles) moduli of DBS-CONH<sub>2</sub>/alginate multicomponent hydrogel (0.3% wt/vol DBS-CONH<sub>2</sub> and 0.5% wt/vol alginate) with increasing shear strain (left) and frequency (right).

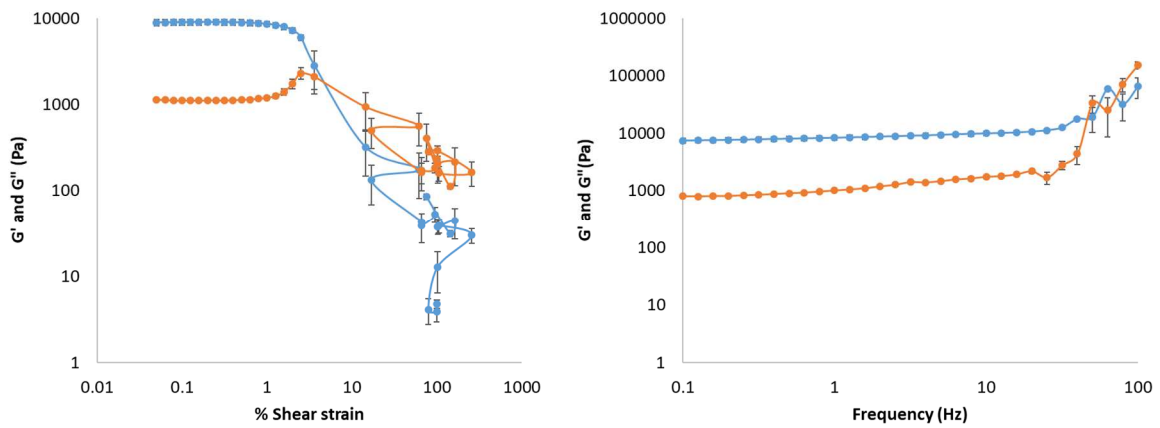

Figure S17. Elastic ( $G'$ , blue circles) and viscous ( $G''$ , orange circles) moduli of DBS-CONH<sub>2</sub>/alginate multicomponent hydrogel (0.3% wt/vol DBS-CONH<sub>2</sub> and 0.5% wt/vol alginate - loaded with 1 mL AgNO<sub>3</sub>, 10 mM) with increasing shear strain (left) and frequency (right).

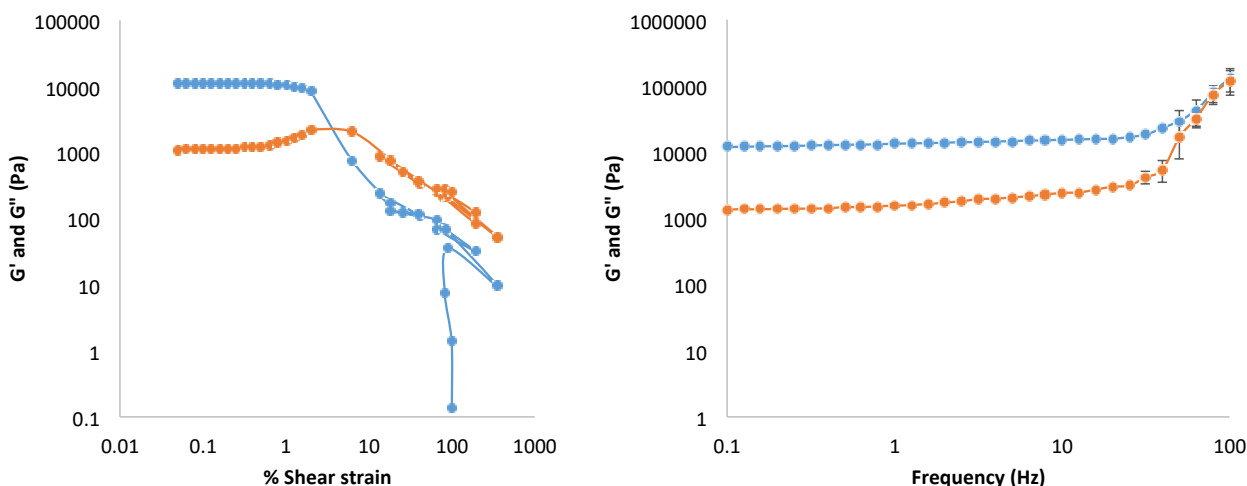

Figure S18. Elastic ( $G'$ , blue circles) and viscous ( $G''$ , orange circles) moduli of DBS-CONHNH<sub>2</sub>/alginate multicomponent hydrogel (0.3% wt/vol DBS-CONHNH<sub>2</sub> and 0.5% wt/vol alginate - loaded with 3 mL AgNO<sub>3</sub>, 10 mM) with increasing shear strain (left) and frequency (right).

## S8 Disc diffusion assay

**S8.1 Gel preparation.** The gels were prepared in sterile conditions in 75  $\mu$ L volume in a 96 well plate as described in Section S2. The gel beads were prepared using 20  $\mu$ L volume/gel bead and 4 beads were placed in each well. The *in situ* formation of Ag NPs was induced by immersing the gels in 75  $\mu$ L of a 10 mM solution of AgNO<sub>3</sub> for 3 days. After 3 days, the supernatant was gently removed and the gels were carefully washed with water multiple times. The gels were then transferred on the agar plates, where the bacteria were cultured, for the disc diffusion assay.

**S8.2 Disc diffusion assay.** Cells from glycerol stocks were used to inoculate LB medium (5 mL; 10 g L<sup>-1</sup> tryptone, 5 g L<sup>-1</sup> yeast, 10 g L<sup>-1</sup> NaCl), performed in triplicate for each strain. Cultures were grown at 37 °C with shaking at 180 rpm for 17 h. Cultures were diluted to OD<sub>600</sub> 0.1, followed by a further 1:100 dilution, with autoclaved water. These cultures were spread onto LB agar (75  $\mu$ L per plate; 10 g L<sup>-1</sup> tryptone, 5 g L<sup>-1</sup> yeast, 10 g L<sup>-1</sup> NaCl, 15 g L<sup>-1</sup> agar). A 200  $\mu$ L pipette tip was used to remove discs from the agar, into which gels were inserted. Plates were incubated at 37°C for 24 h before inhibition radii were measured. Bacterial Strains: vancomycin-resistant *Enterococcus faecium* (VRE):

DSM 17050 (<https://www.dsmz.de/collection/catalogue/details/culture/dsm-17050>). *Pseudomonas aeruginosa* (PA14)

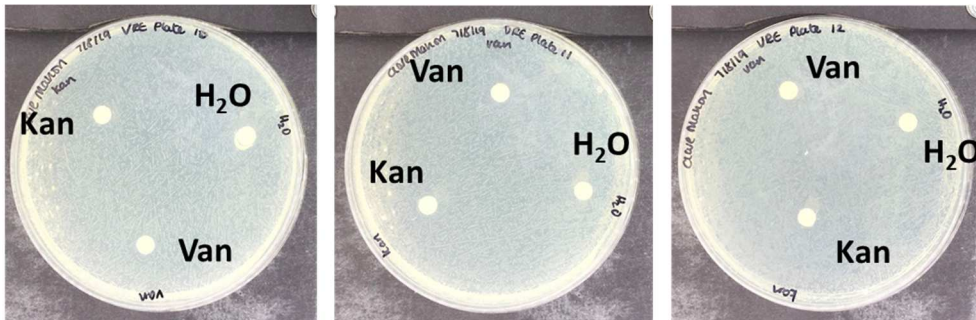

Figure S19. Disc diffusion assay - vancomycin-resistant *E. faecium* (VRE) (VRE). Controls: water ( $H_2O$ ), kanamycin (Kan), vancomycin (Van).

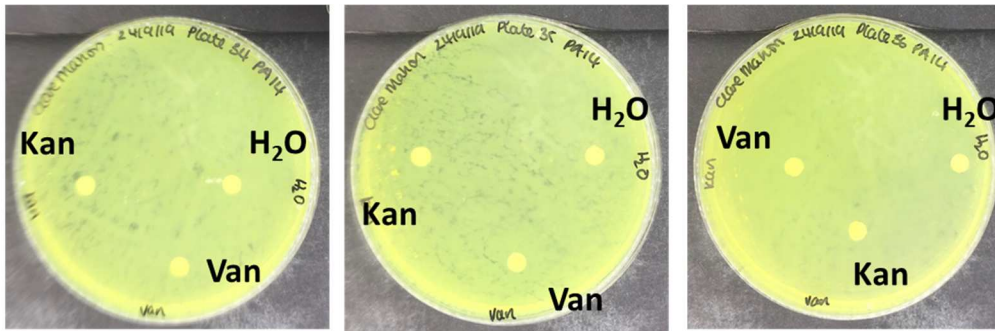

Figure S20. Disc diffusion assay – *P. aeruginosa* (PA14). Controls: water ( $H_2O$ ), kanamycin (Kan), vancomycin (Van).



Table S4. Inhibition Radii from disc diffusion assay - vancomycin-resistant *E. faecium* (VRE).

| Vancomycin-resistant <i>E. faecium</i> (VRE)       |                                        |                                        |                                        |                                 |                |
|----------------------------------------------------|----------------------------------------|----------------------------------------|----------------------------------------|---------------------------------|----------------|
| Gel                                                | Inhibition radii -<br>Replicate 1 (mm) | Inhibition radii -<br>Replicate 2 (mm) | Inhibition radii -<br>Replicate 3 (mm) | Inhibition radii -<br>Mean (mm) | Standard Error |
| Alginate (discs)                                   | 2                                      | 2                                      | 3                                      | 2.33                            | 0.33           |
| Alginate (beads)                                   | 3                                      | 3                                      | 3                                      | 3.00                            | 0.00           |
| Alginate (discs) – no Ag NPs                       | 0                                      | 0                                      | 0                                      | 0.00                            | 0.00           |
| Alginate (beads) – no Ag NPs                       | 0                                      | 0                                      | 0                                      | 0.00                            | 0.00           |
| Alginate/DBS-CONH <sub>2</sub> (discs)             | 3                                      | 1                                      | 2                                      | 2.00                            | 0.58           |
| Alginate/DBS-CONH <sub>2</sub> (beads)             | 2                                      | 2                                      | 3                                      | 2.33                            | 0.33           |
| Alginate/DBS-CONH <sub>2</sub> (discs) – no Ag NPs | 0                                      | 0                                      | 0                                      | 0.00                            | 0.00           |
| Alginate/DBS-CONH <sub>2</sub> (beads) – no Ag NPs | 0                                      | 0                                      | 0                                      | 0.00                            | 0.00           |
| DBS-CONH <sub>2</sub>                              | 3                                      | 3                                      | 3                                      | 3.00                            | 0.00           |
| DBS-CONH <sub>2</sub> – no Ag NPs                  | 0                                      | 0                                      | 0                                      | 0.00                            | 0.00           |

Table S5. Inhibition Radii from disc diffusion assay - *Pseudomonas aeruginosa* (PA14).

| <i>Pseudomonas aeruginosa</i> (PA14)               |                                        |                                        |                                        |                                 |                |
|----------------------------------------------------|----------------------------------------|----------------------------------------|----------------------------------------|---------------------------------|----------------|
| Gel                                                | Inhibition radii -<br>Replicate 1 (mm) | Inhibition radii -<br>Replicate 2 (mm) | Inhibition radii -<br>Replicate 3 (mm) | Inhibition radii<br>- Mean (mm) | Standard Error |
| Alginate (discs)                                   | 4                                      | 2                                      | 3                                      | 3.00                            | 0.58           |
| Alginate (beads)                                   | 4                                      | 3                                      | 1                                      | 2.67                            | 0.88           |
| Alginate (discs) – no Ag NPs                       | 0                                      | 0                                      | 0                                      | 0.00                            | 0.00           |
| Alginate (beads) – no Ag NPs                       | 0                                      | 0                                      | 0                                      | 0.00                            | 0.00           |
| Alginate/DBS-CONH <sub>2</sub> (discs)             | 4                                      | 2                                      | 3                                      | 3.00                            | 0.58           |
| Alginate/DBS-CONH <sub>2</sub> (beads)             | 3                                      | 2                                      | 3                                      | 2.67                            | 0.33           |
| Alginate/DBS-CONH <sub>2</sub> (discs) – no Ag NPs | 0                                      | 0                                      | 0                                      | 0.00                            | 0.00           |
| Alginate/DBS-CONH <sub>2</sub> (beads) – no Ag NPs | 0                                      | 0                                      | 0                                      | 0.00                            | 0.00           |
| DBS-CONH <sub>2</sub>                              | 4                                      | 2                                      | 3                                      | 3.67                            | 0.33           |
| DBS-CONH <sub>2</sub> – no Ag NPs                  | 0                                      | 0                                      | 0                                      | 0.00                            | 0.00           |

## S9 Release of Ag(I) from DBS-CONH<sub>2</sub>/alginate gel beads loaded with Ag NPs

**S9.1 Preparation of gel beads.** The DBS-CONH<sub>2</sub>/alginate gel beads (40 beads/sample) were prepared as described in section S2 using 20 µL volume/gel bead and washed with water multiple

times. The *in situ* formation of Ag NPs was induced by immersing the gels in 3 ml of a 10 mM solution of AgNO<sub>3</sub> for 24 hours. After 24 hours, the supernatant was removed and used to calculate the exact amount of Ag (I) incorporated by precipitation titration as described in Section S4.2. To ensure reproducibility, three samples of 40 beads each were prepared for each time point and the exact amount of Ag (I) incorporated in each sample was calculated and reported in Table S6.

Table S6. Amount of Ag(I) incorporated in each sample of 40 gel beads used for the release study.

| Sample name | Mmoles of Ag (I) incorporated into 40 gel beads | % of Ag (I) incorporated |
|-------------|-------------------------------------------------|--------------------------|
| A           | 0.013                                           | 44.4                     |
| B           | 0.014                                           | 47.4                     |
| C           | 0.016                                           | 54.5                     |
| D           | 0.012                                           | 41.2                     |
| E           | 0.016                                           | 52.4                     |
| F           | 0.013                                           | 44.4                     |
| G           | 0.013                                           | 44.4                     |
| H           | 0.015                                           | 50.0                     |
| I           | 0.014                                           | 47.4                     |
| J           | 0.016                                           | 54.5                     |
| K           | 0.016                                           | 54.5                     |
| L           | 0.014                                           | 47.4                     |
| M           | 0.017                                           | 58.3                     |
| N           | 0.016                                           | 54.5                     |
| O           | 0.012                                           | 41.2                     |
| P           | 0.012                                           | 41.2                     |
| Q           | 0.013                                           | 44.4                     |
| R           | 0.015                                           | 50.0                     |
| S           | 0.014                                           | 47.4                     |
| T           | 0.013                                           | 44.4                     |
| U           | 0.014                                           | 47.4                     |
| V           | 0.014                                           | 47.4                     |
| W           | 0.013                                           | 44.4                     |
| X           | 0.016                                           | 54.5                     |

S9.2 Release of Ag(I) from DBS-CONHNH<sub>2</sub>/alginate gel beads. Each sample (40 gel beads/sample) was immersed in 2 ml of water. At the specified time intervals, the release medium was removed and used to titrate a 0.1 mM solution of NaCl (1 mL) in the presence of K<sub>2</sub>CrO<sub>4</sub> (5% - 1 mL) as an indicator. To evaluate precisely the volume of titrant used, the titration was performed by slowly adding the titrant to the NaCl solution in 10 µL drops under stirring. The volume of supernatant added as a titrant, was used to calculate the mmoles of released Ag (I) (Table S7). To ensure data

reproducibility, this experiment was performed in triplicate for each gel and average values were reported in the final graph.

Table S7. Ag(I) released from each sample.

| Sample name | Time point (hours) | mmoles of Ag (I) released from gel beads | % of Ag (I) released | Average % | Standard error |
|-------------|--------------------|------------------------------------------|----------------------|-----------|----------------|
| A           | 0.5                | 0.0025                                   | 18.75                | 17.51     | 1.38           |
| B           | 0.5                | 0.0026                                   | 18.04                |           |                |
| C           | 0.5                | 0.0026                                   | 16.08                |           |                |
| D           | 1                  | 0.0027                                   | 21.59                | 19.32     | 2.20           |
| E           | 1                  | 0.0027                                   | 17.20                |           |                |
| F           | 1                  | 0.0026                                   | 19.74                |           |                |
| G           | 1.5                | 0.0028                                   | 21.43                | 19.31     | 2.19           |
| H           | 1.5                | 0.0026                                   | 17.09                |           |                |
| I           | 1.5                | 0.0028                                   | 19.82                |           |                |
| J           | 2                  | 0.0028                                   | 17.46                | 15.98     | 2.28           |
| K           | 2                  | 0.0022                                   | 13.58                |           |                |
| L           | 2                  | 0.0025                                   | 17.59                |           |                |
| M           | 4                  | 0.0026                                   | 14.65                | 17.86     | 4.76           |
| N           | 4                  | 0.0028                                   | 16.97                |           |                |
| O           | 4                  | 0.0029                                   | 23.81                |           |                |
| P           | 6                  | 0.0025                                   | 20.24                | 19.57     | 0.78           |
| Q           | 6                  | 0.0027                                   | 20.00                |           |                |
| R           | 6                  | 0.0028                                   | 18.78                |           |                |
| S           | 8                  | 0.0025                                   | 17.59                | 18.42     | 0.82           |
| T           | 8                  | 0.0026                                   | 19.23                |           |                |
| U           | 8                  | 0.0026                                   | 18.52                |           |                |
| V           | 24                 | 0.0025                                   | 17.37                | 17.67     | 1.99           |
| W           | 24                 | 0.0027                                   | 20.00                |           |                |
| X           | 24                 | 0.0026                                   | 16.08                |           |                |

## S10 References

- [1] B. O. Okesola and D. K. Smith, *Chem. Commun.*, 2013, **49**, 11164-11166.
- [2] D. J. Cornwell, B. O. Okesola and D. K. Smith, *Soft Matter*, 2013, **9**, 8730-8736.
